# Supplementary material
Source: HighWire-hosted journal article supplement (http://www.ajnr.org/highwire/filestream/52204/field_highwire_adjunct_files/0/1397_table.pdf)
Supplement: 1397_table.pdf [file 1397_table.pdf]

**On-line Table 1: Bivariate analyses of z-scores for MRI measures and risk of progression to a diagnosis of AD**

| Temporoparietal Regions of Interest | Risk of Progression to AD in Subjects with MCI at Baseline ( <i>n</i> = 129) |           |          |           |           |          |
|-------------------------------------|------------------------------------------------------------------------------|-----------|----------|-----------|-----------|----------|
|                                     | Crude*                                                                       |           |          | Adjusted† |           |          |
|                                     | HR                                                                           | 95% CI    | <i>P</i> | HR        | 95% CI    | <i>P</i> |
| Amygdala                            | 0.59                                                                         | 0.43–0.80 | .0009    | 0.66      | 0.46–0.93 | .02      |
| Banks superior temporal sulcus      | 0.96                                                                         | 0.68–1.34 | .79      | 0.98      | 0.71–1.36 | .91      |
| Entorhinal cortex                   | 0.53                                                                         | 0.37–0.77 | .0007    | 0.54      | 0.37–0.78 | .001     |
| Fusiform gyrus                      | 0.61                                                                         | 0.44–0.85 | .004     | 0.67      | 0.48–0.94 | .02      |
| Hippocampus                         | 0.64                                                                         | 0.47–0.87 | .005     | 0.73      | 0.51–1.04 | .08      |
| Inferior parietal lobule            | 0.58                                                                         | 0.43–0.78 | .0004    | 0.64      | 0.46–.88  | .005     |
| Inferior temporal gyrus             | 0.97                                                                         | 0.73–1.30 | .83      | 1.1       | 0.81–1.44 | .60      |
| Isthmus of cingulate cortex         | 0.88                                                                         | 0.64–1.20 | .43      | .87       | 0.63–1.20 | .38      |
| Middle temporal gyrus               | 0.59                                                                         | 0.44–0.80 | .0008    | 0.64      | 0.47–0.86 | .004     |
| Parahippocampal gyrus               | 0.94                                                                         | 0.69–1.30 | .68      | 1.03      | 0.76–1.40 | .84      |
| Posterior cingulate cortex          | 0.80                                                                         | 0.59–1.10 | .17      | 0.86      | 0.62–1.19 | .35      |
| Precuneus cortex                    | 0.89                                                                         | 0.66–1.22 | .49      | 0.98      | 0.71–1.36 | .92      |
| Superior parietal lobule            | 1.10                                                                         | 0.80–1.49 | .56      | 1.22      | 0.87–1.71 | .26      |
| Superior temporal gyrus             | 0.77                                                                         | 0.57–1.04 | .09      | 0.88      | 0.64–1.20 | .42      |
| Supramarginal gyrus                 | 0.65                                                                         | 0.47–0.88 | .006     | 0.71      | 0.51–0.99 | .04      |
| Temporal pole                       | 0.83                                                                         | 0.60–1.14 | .25      | 0.91      | 0.66–1.2  | .58      |

**Note:**—MRI indicates MR imaging; CI, confidence interval; AD, Alzheimer disease; HR, hazard ratio.

\* Adjusted for intracranial cavity (ICC) only.

† Adjusted for ICC and age at baseline visit.
